# Supplementary material for: A Structural Systems Biology Approach for Quantifying the Systemic Consequences of Missense Mutations in Proteins
Source: PLOS journal article supplement (doi:10.1371/journal.pcbi.1002738), 2012-10-18

Figure S6

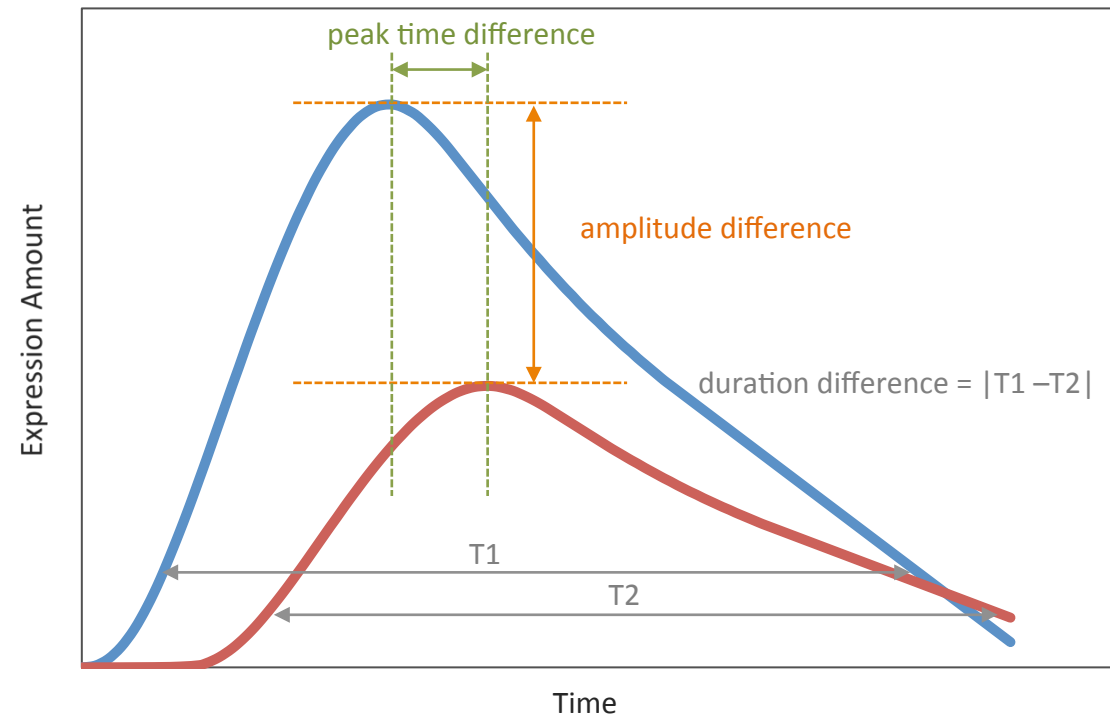

Supplement: S6 (10.1371/journal.pcbi.1002738.s006) [file journal.pcbi.1002738.s006]
